# Supplementary material for: Design and Economic Assessment of Alternative Evaporation Processes for Poly-Lactic Acid Production
Source: MDPI journal article supplement (doi:10.3390/polym14102120), 2022-05-23
Supplement: s1 [file s1]

# Supplementary Materials

## Design and Economic Assessment of Alternative Evaporation Processes for Poly-Lactic Acid Production

Jonghun Lim 1,2,†, Hyungtae Cho 1,†, Kwon-chan Son 3, Yup Yoo 1,2 and Junghwan Kim 1,\*

1 Green Materials and Processes R&D Group, Korea Institute of Industrial Technology, 55, Jonga-ro, Ulsan 44413, Korea; ljh94@kitech.re.kr (J.L.); htcho@kitech.re.kr (H.C.); yoo yup@kitech.re.kr (Y.Y.)

2 Department of Chemical and Biomolecular Engineering, Yonsei University, 50, Yensei-ro, Seoul 03722, South Korea

3 Advanced Materials Production Dept, KCC Corporation, 19, Wanjusandan 4(sa)-ro, Jeonju 55321, South Ko-rea; kcson@kccword.co.kr

\* Correspondence: author: kjh31@kitech.re.kr

† These authors contributed equally to this work.

### A. Developed process model of each process

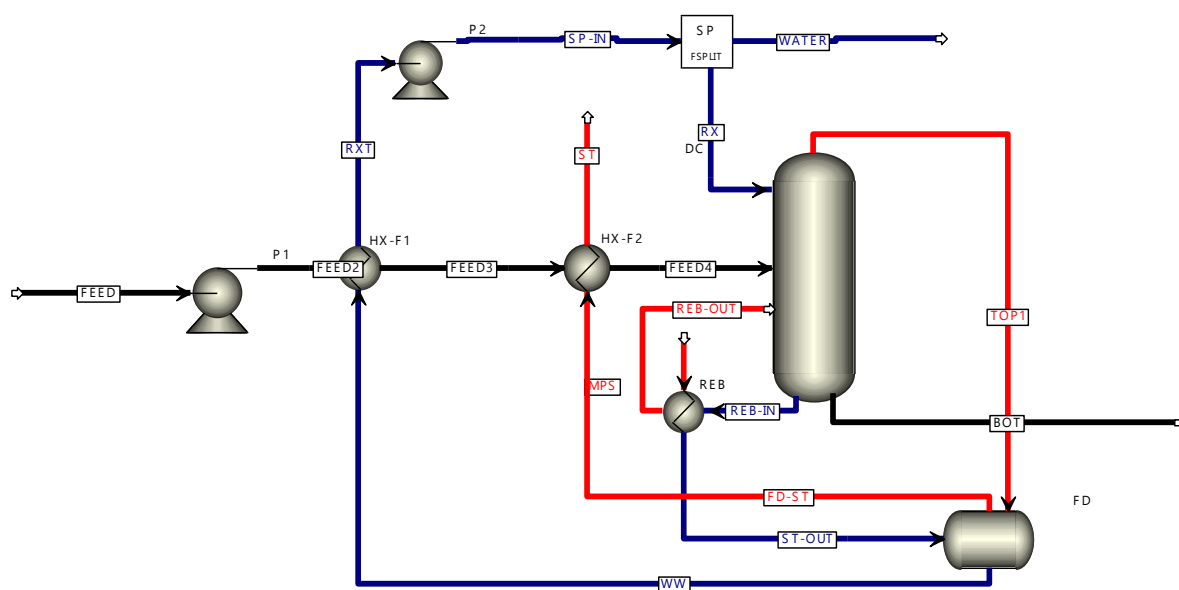

Figure S1. Model of conventional process using SEE

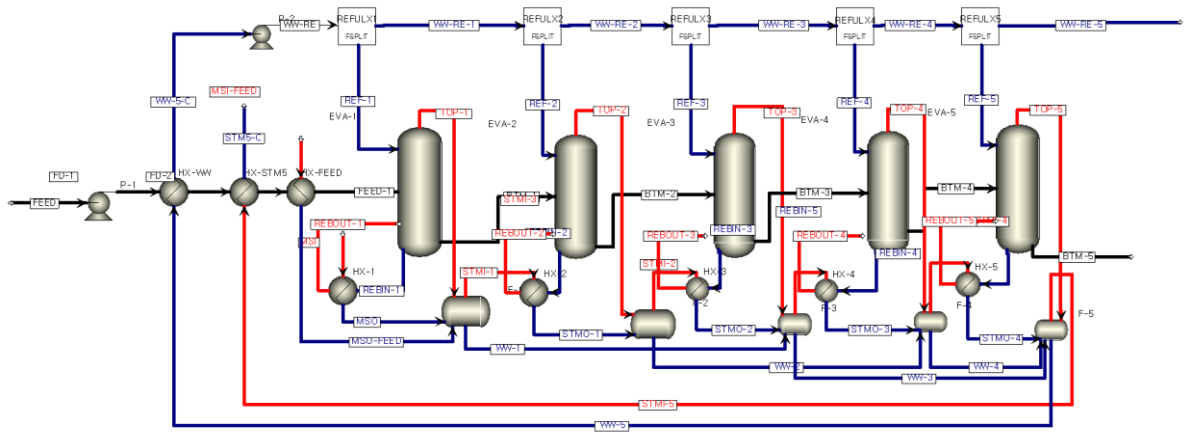

Figure S2. Model of alternative process using MEE

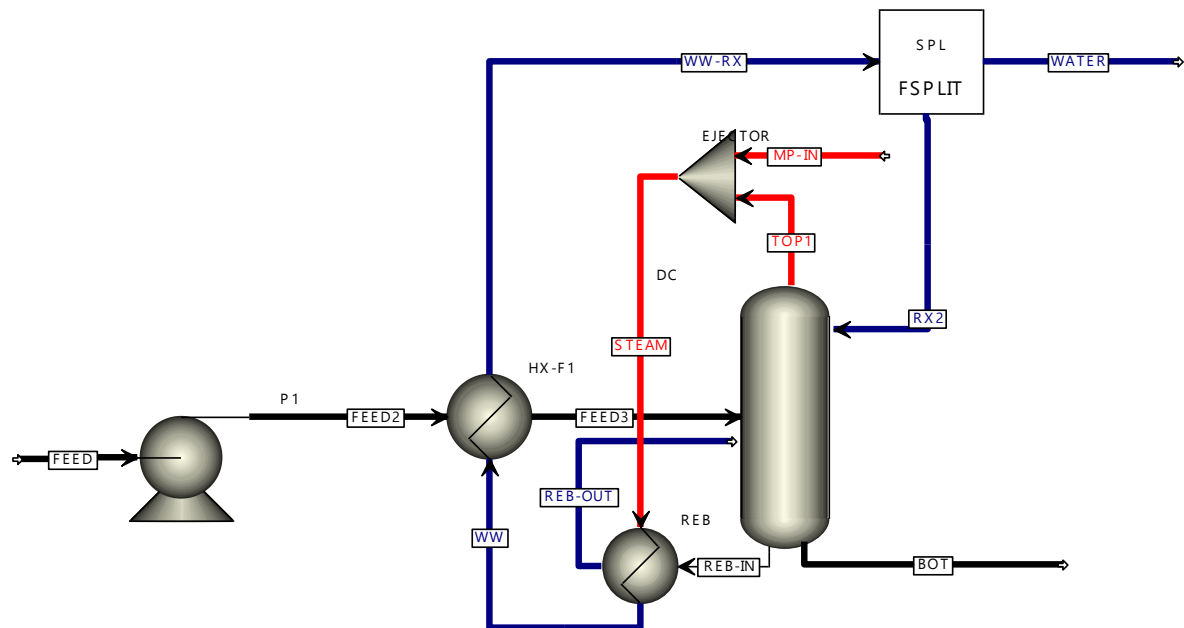

Figure S3. Model of alternative process using TVR

## B. Detailed simulation results of each process

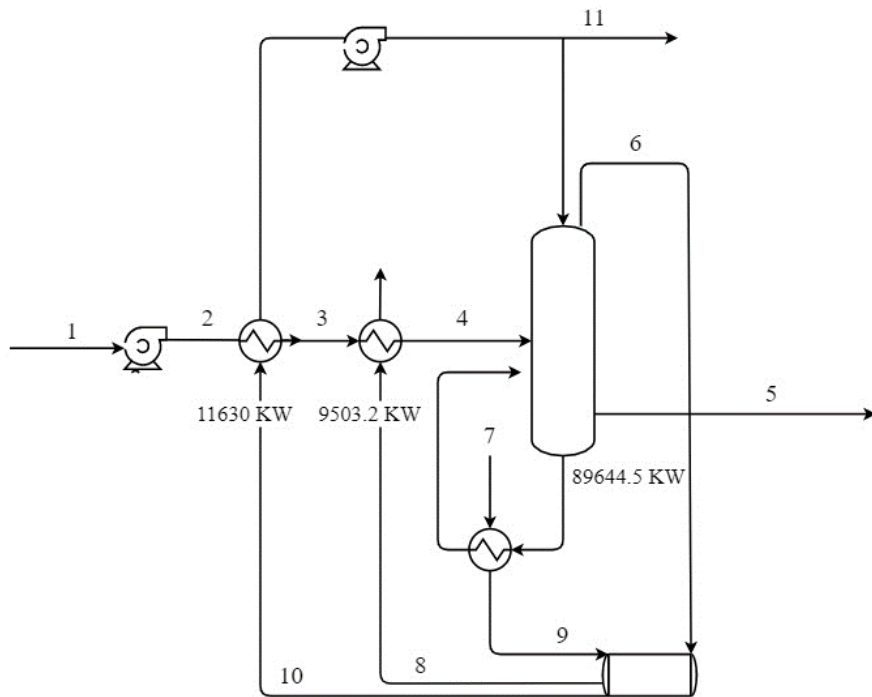

Figure S4. Simplified diagram of the stream number in conventional process using SEE

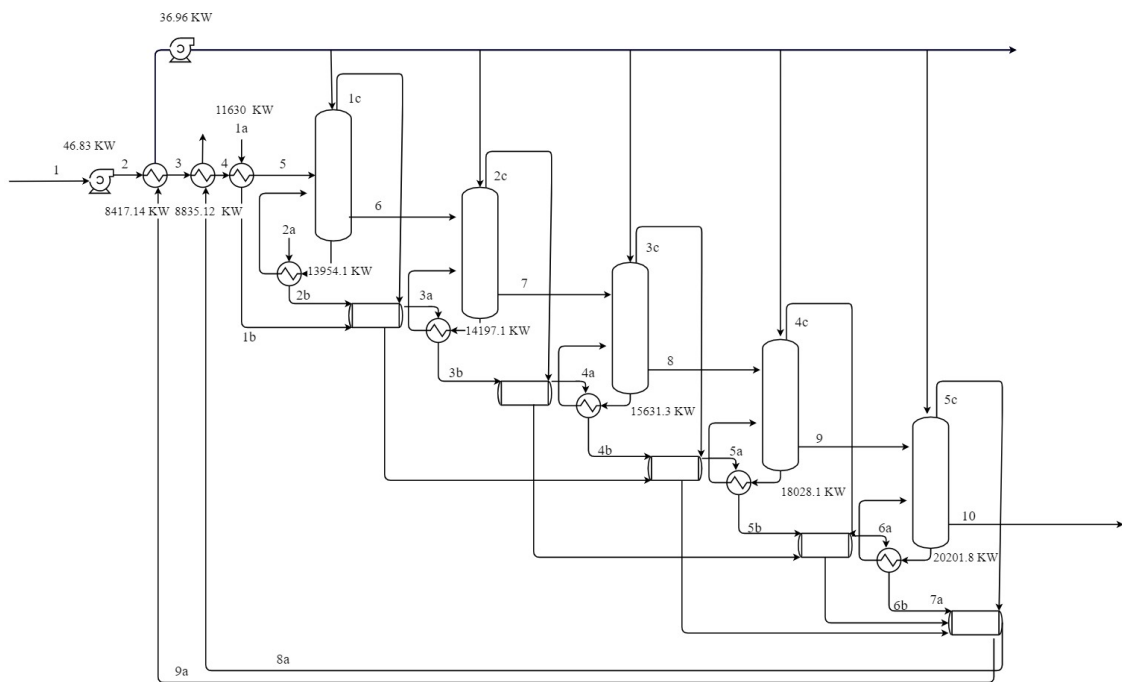

Figure S5. Simplified diagram of the stream number in alternative process using MEE

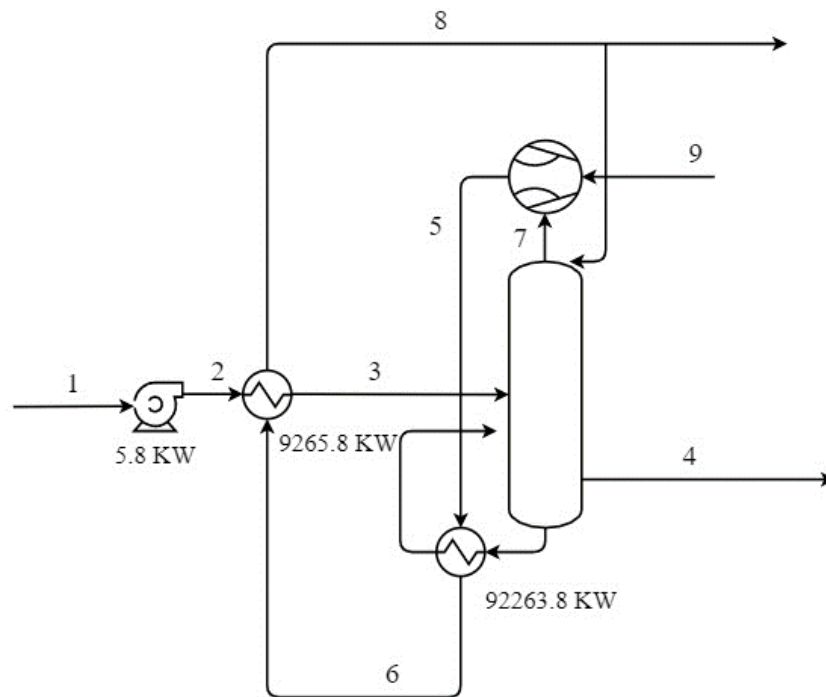

Figure S6. Simplified diagram of the stream number in alternative process using TVR

Table S1. Stream result of the conventional process

| Classification | 1       | 2       | 3       | 4       | 5      | 6       | 7       | 8       | 9       | 10      | 11      | Units                 |
|----------------|---------|---------|---------|---------|--------|---------|---------|---------|---------|---------|---------|-----------------------|
| Phase          | Liquid  | Liquid  | Liquid  | Liquid  | Liquid | Vapor   | Vapor   | Vapor   | Liquid  | Liquid  | Liquid  |                       |
| Temperature    | 25      | 25.09   | 88.37   | 138.28  | 159.2  | 143.3   | 179.27  | 143.28  | 179.27  | 143.28  | 77.5    | °C                    |
| Pressure       | 0       | 8       | 8       | 8       | 3.1    | 3       | 9       | 3       | 9       | 3       | 8       | kg/cm <sup>2</sup> ·g |
| Mass flows     | 161,600 | 161,600 | 161,600 | 161,600 | 21,535 | 147,565 | 161,726 | 161,872 | 161,726 | 147,419 | 139,919 | kg/h                  |
| Mass fractions |         |         |         |         |        |         |         |         |         |         |         |                       |
| LA             | 0.1     | 0.1     | 0.1     | 0.1     | 0.75   | 0       | 0       | 0       | 0       | 0       | 0       |                       |
| WATER          | 0.9     | 0.9     | 0.9     | 0.9     | 0.25   | 1       | 1       | 1       | 1       | 1       | 1       |                       |

Table S2. Stream results of the alternative process using MEE

| Classification       | 1       | 2       | 3       | 4       | 5       | 6       | 7       | 8      | 9      | 10     | Units                 |
|----------------------|---------|---------|---------|---------|---------|---------|---------|--------|--------|--------|-----------------------|
| Phase                | Liquid  | Liquid | Liquid | Liquid |                       |
| Temperature          | 25.09   | 70.75   | 116.7   | 25      | 173.53  | 173.76  | 166.65  | 158.51 | 148.45 | 134.37 | °C                    |
| Pressure             | 8       | 8       | 8       | 0       | 8       | 7.6     | 6.2     | 4.81   | 3.35   | 1.2    | kg/cm <sup>2</sup> ·g |
| Mass vapor fraction  | 0       | 0       | 0       | 0       | 0       | 0       | 0       | 0      | 0      | 0      |                       |
| Mass liquid fraction | 1       | 1       | 1       | 1       | 1       | 1       | 1       | 1      | 1      | 1      |                       |
| Mass flows           | 161,600 | 161,600 | 161,600 | 161,600 | 161,600 | 138,850 | 113,650 | 86,350 | 55,645 | 21,356 | kg/h                  |
| Mass fractions       |         |         |         |         |         |         |         |        |        |        |                       |
| LA                   | 0.1     | 0.1     | 0.1     | 0.1     | 0.1     | 0.12    | 0.14    | 0.19   | 0.29   | 0.75   |                       |
| WATER                | 0.9     | 0.9     | 0.9     | 0.9     | 0.9     | 0.88    | 0.86    | 0.81   | 0.71   | 0.25   |                       |

Table S2. Stream results of the alternative process using MEE (Continued)

| Classification       | 1a     | 2a     | 3a      | 4a     | 5a     | 6a     | 7a     | 1b     | 2b     | 3b     | 4b     | 5b     | 6b     | Units                 |
|----------------------|--------|--------|---------|--------|--------|--------|--------|--------|--------|--------|--------|--------|--------|-----------------------|
| Phase                | Vapor  | Vapor  | Vapor   | Vapor  | Vapor  | Vapor  | Vapor  |        |        |        |        |        | Liquid |                       |
| Temperature          | 179.27 | 179.27 | 172.38  | 165.02 | 156.47 | 145.89 | 121.71 | 179.27 | 179.27 | 172.38 | 165.01 | 156.46 | 145.2  | °C                    |
| Pressure             | 9      | 9      | 7.5     | 6.1    | 4.71   | 3.3    | 1.1    | 9      | 9      | 7.5    | 6.1    | 4.71   | 3.3    | kg/cm <sup>2</sup> .g |
| Mass vapor fraction  | 1      | 1      | 1       | 1      | 1      | 1      | 1      | 0      | 0      | 0      | 0      | 0      | 0      |                       |
| Mass liquid fraction | 0      | 0      | 0       | 0      | 0      | 0      | 0      | 1      | 1      | 1      | 1      | 1      | 1      |                       |
| Mass flows           | 20,800 | 25,000 | 25,156. | 27,323 | 31,065 | 34,142 | 45,048 | 20,800 | 25,000 | 25,156 | 27,323 | 31,065 | 34,142 | kg/h                  |
| Mass fractions       |        |        |         |        |        |        |        |        |        |        |        |        |        |                       |
| LA                   | 0      | 0      | 0       | 0      | 0      | 0      | 0      | 0      | 0      | 0      | 0      | 0      | 0      |                       |
| WATER                | 1      | 1      | 1       | 1      | 1      | 1      | 1      | 1      | 1      | 1      | 1      | 1      | 1      |                       |

Table S2. Stream results of the alternative process using MEE (Continued)

| Classification       | 1c     | 2c     | 3c     | 4c     | 5c     | Units                 |
|----------------------|--------|--------|--------|--------|--------|-----------------------|
| Phase                | Vapor  | Vapor  | Vapor  | Vapor  | Vapor  |                       |
| Temperature          | 172.53 | 165.16 | 156.62 | 145.59 | 121.83 | °C                    |
| Pressure             | 7.5    | 6.1    | 4.71   | 3.25   | 1.1    | kg/cm <sup>2</sup> .g |
| Mass Vapor Fraction  | 1      | 1      | 1      | 1      | 1      |                       |
| Mass Liquid Fraction | 0      | 0      | 0      | 0      | 0      |                       |
| Mass Flows           | 24,300 | 26,800 | 28,800 | 32,300 | 35,393 | kg/h                  |
| Mass Fractions       |        |        |        |        |        |                       |
| LA                   | 0      | 0      | 0      | 0      | 0      |                       |
| WATER                | 1      | 1      | 1      | 1      | 1      |                       |

Table S3. Stream results of the alternative process using TVR

| Classification       | 1      | 2      | 3      | 4      | 5         | 6         | 7        | 8         | 9        | Units                |
|----------------------|--------|--------|--------|--------|-----------|-----------|----------|-----------|----------|----------------------|
| Phase                | Liquid | Liquid | Liquid | Liquid |           |           | Vapor    | Liquid    | Vapor    |                      |
| Temperature          | 25     | 25.01  | 75.53  | 104.91 | 123.16    | 123.16    | 88.82    | 80.53     | 179.27   | °C                   |
| Pressure             | 0      | 1      | 1      | -0.25  | 1.2       | 1.2       | -0.35    | 1.2       | 9        | kg/cm <sup>2</sup> g |
| Mass Vapor Fraction  | 0      | 0      | 0      | 0      | 0.98      | 0.01      | 1        | 0         | 1        |                      |
| Mass Liquid Fraction | 1      | 1      | 1      | 1      | 0.02      | 0.99      | 0        | 1         | 0        |                      |
| Mass Flows           | 161600 | 161600 | 161600 | 21546  | 163770.89 | 163770.89 | 147554   | 163770.89 | 16216.89 | kg/h                 |
| Mass Fractions       |        |        |        |        |           |           |          |           |          |                      |
| WATER                | 0.9    | 0.9    | 0.9    | 0.25   | 1         | 1         | 1        | 1         | 1        |                      |
| LA                   | 0.1    | 0.1    | 0.1    | 0.75   | 0.00E+00  | 0.00E+00  | 0.00E+00 | 0.00E+00  | 0        |                      |

### C. Detailed description of equivalent annual cost calculation

Table S4. Detailed description of equivalent annual cost calculation

| Classification              | Remark                      |
|-----------------------------|-----------------------------|
| <b>Direct cost onsite</b>   |                             |
| Purchased Equipment(\$)     | E                           |
| Instruments(\$)             | 47% E                       |
| Installation(\$)            | 18% E                       |
| Piping(\$)                  | 66% E                       |
| Electrical(\$)              | 11% E                       |
| <b>Direct costs offsite</b> |                             |
| Buildings(\$)               | 18% E                       |
| Yard Improvements(\$)       | 10% E                       |
| Service facilities(\$)      | 70% E                       |
| Land(\$)                    | 6% E                        |
| <b>Indirect Cost</b>        |                             |
| Engineering(\$)             | 33% E                       |
| construction(\$)            | 41% E                       |
| Contracter's fee(\$)        | 5%(Direct+ Eng + Const)     |
| Contingency(\$)             | 10%(Direct + Eng +Const)    |
| <b>Working Capital</b>      | 15% of FCI                  |
| <b>FCI(\$)</b>              | Direct cost + Indirect cost |
| <b>TCI(\$)</b>              | FCI+ Working capital        |
| <b>EAC(\$)</b>              | TCI/AF                      |
